# Supplementary material for: Molecular structures of cdc2-like kinases in complex with a new inhibitor chemotype
Source: PLOS journal article supplement (doi:10.1371/journal.pone.0196761), 2018-05-03
Supplement: S1 (10.1371/journal.pone.0196761.s001) [file journal.pone.0196761.s001.pdf]

# Molecular structures of cdc2-like kinases in complex with a new inhibitor chemotype

Anne Walter, Apirat Chaikuad, Renate Helmer, Nadège Loaëc, Lutz Preu, Ingo Ott, Stefan Knapp, Laurent Meijer, Conrad Kunick

## Supporting information

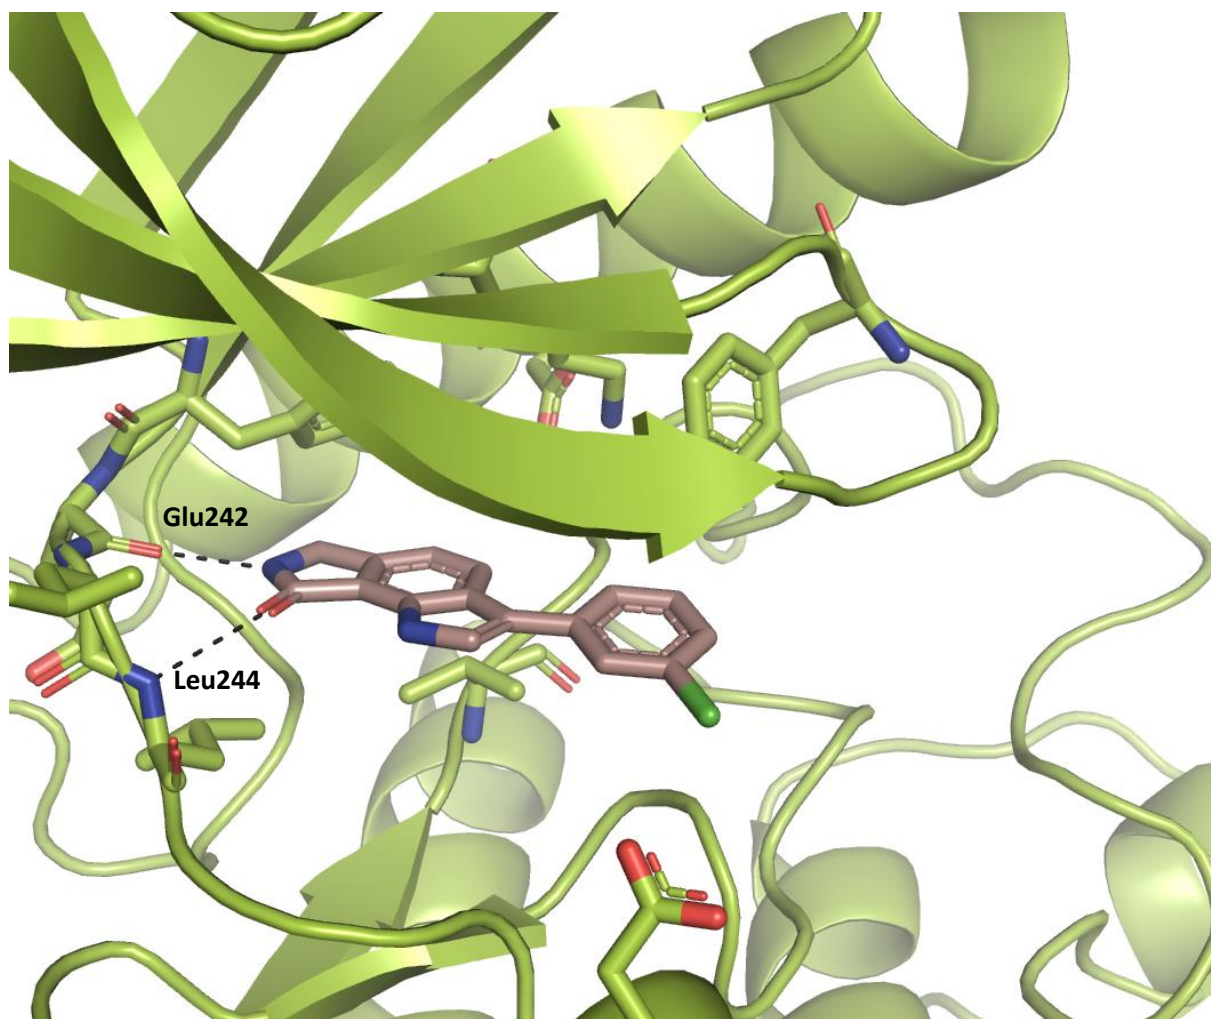

**S1 Fig.** Result of a docking experiment with **8c** in CLK1 (PDB: 1Z57).
