# Supplementary material for: Molecular structures of cdc2-like kinases in complex with a new inhibitor chemotype
Source: PLOS journal article supplement (doi:10.1371/journal.pone.0196761), 2018-05-03
Supplement: S2 (10.1371/journal.pone.0196761.s002) [file journal.pone.0196761.s002.pdf]

# Molecular structures of cdc2-like kinases in complex with a new inhibitor chemotype

Anne Walter, Apirat Chaikuad, Renate Helmer, Nadège Loaëc, Lutz Preu, Ingo Ott, Stefan Knapp, Laurent Meijer, Conrad Kunick

## Supporting information

**S1 Table: Results from a screening campaign<sup>a</sup> towards new CLK inhibitors.** Residual enzyme activity [% ± SEM] in the presence of 6,7-dihydropyrrolo[3,4-g]indol-8(1*H*)-ones at 10 μM concentration<sup>b</sup>

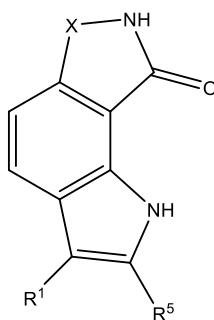

**8a, S18a-e** X: CH<sub>2</sub>  
**S19** X: C=O

|             | R <sup>1</sup>                | R <sup>5</sup>                | CDK1/<br>cyclin B | CDK2/<br>cyclin A | CDK5/<br>p25 | CDK9/<br>cyclin T | CK1  | CLK<br>1    | CLK<br>2    | CLK<br>3 | CLK<br>4    | DYRK<br>1A | DYRK<br>1B | DYRK<br>2   | DYRK<br>3 | GSK3   |
|-------------|-------------------------------|-------------------------------|-------------------|-------------------|--------------|-------------------|------|-------------|-------------|----------|-------------|------------|------------|-------------|-----------|--------|
| <b>8a</b>   | Phe                           | H                             | 71±21             | 101±6             | 107±20       | 85±5              | 91±4 | <b>8±2</b>  | <b>14±3</b> | 78±9     | <b>2±0</b>  | 61±12      | 51±9       | 69±15       | 102±13    | 111±19 |
| <b>S18a</b> | CH <sub>3</sub>               | C <sub>2</sub> H <sub>5</sub> | 94±13             | 99±8              | 100±9        | 93±5              | 50±6 | <b>20±2</b> | 31±4        | 92±12    | <b>7±2</b>  | 54±1       | 46±8       | 42±12       | 65±9      | 97±3   |
| <b>S18b</b> | CH <sub>3</sub>               | CH <sub>3</sub>               | 93±26             | 103±2             | 111±18       | 104±7             | 75±3 | 92±8        | 63±17       | 104±14   | 48±6        | 82±5       | 77±11      | 61±4        | 89±8      | 135±18 |
| <b>S18c</b> | CH <sub>3</sub>               | Ph                            | 77±26             | 109±8             | 105±11       | 89±6              | 57±5 | <b>29±4</b> | <b>30±1</b> | 93±9     | <b>10±0</b> | 58±7       | 50±7       | 57±25       | 91±17     | 112±2  |
| <b>S18d</b> | C <sub>2</sub> H <sub>5</sub> | Ph                            | 109±30            | 104±2             | 112±11       | 100±10            | 86±3 | 66±3        | 66±5        | 110±16   | 38±3        | 74±14      | 65±8       | 50±6        | 87±5      | 111±7  |
| <b>S18e</b> | CH <sub>3</sub>               | 4-CH <sub>3</sub> -Ph         | 100±20            | 102±9             | 114±11       | 101±3             | 84±7 | 105±12      | 77±6        | 105±10   | 64±9        | 99±16      | 85±7       | 75±11       | 92±9      | 120±31 |
| <b>S19</b>  | CH <sub>3</sub>               | CH <sub>3</sub>               | 81±27             | 108±8             | 94±4         | 90±5              | 65±5 | 52±10       | 33±7        | 91±11    | <b>21±1</b> | 41±8       | 39±5       | <b>20±5</b> | 57±3      | 51±5   |

<sup>a</sup> Compounds **8a**, **S18a-e** and **S19** were part of an in-house inventory.

<sup>b</sup> SEM = standard error of the mean
