# Supplementary material for: Molecular structures of cdc2-like kinases in complex with a new inhibitor chemotype
Source: PLOS journal article supplement (doi:10.1371/journal.pone.0196761), 2018-05-03
Supplement: S3 (10.1371/journal.pone.0196761.s003) [file journal.pone.0196761.s003.pdf]

# Molecular structures of cdc2-like kinases in complex with a new inhibitor chemotype

Anne Walter, Apirat Chaikuad, Renate Helmer, Nadège Loaëc, Lutz Preu, Ingo Ott, Stefan Knapp, Laurent Meijer, Conrad Kunick

## Supporting information

**S2 Table: Results with compound KuWal151 (8c) in a crystal violet proliferation assay<sup>a</sup>**

| Cell line          | GI <sub>50</sub> [ $\mu$ M] $\pm$ SD |
|--------------------|--------------------------------------|
| HT-29              | 0.12 $\pm$ 0.01                      |
| MCF-7 <sup>b</sup> | 0.35 $\pm$ 0.16                      |
| MDA-MB-231         | 0.28 $\pm$ 0.05                      |
| RC-124             | 0.44 $\pm$ 0.10                      |

<sup>a</sup> experiments carried out in triplicate, SD = sample standard deviation

<sup>b</sup> experiment carried out in duplicate
